# Supplementary material
Source: Springer Nature journal article supplement (https://www.springermedizin.de/resource/supplementary/12990_2007_109_MOESM7_ESM.pdf/9612586)

**A**HEK293: TRPV1-S800A/ET<sub>A</sub>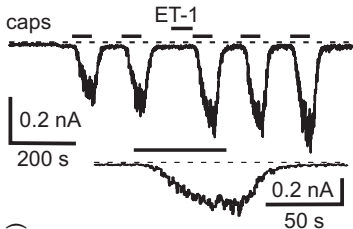**B**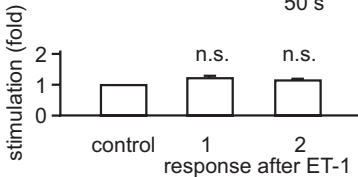

Supplement: MOESM7 [file 9612586]
